# Supplementary material for: Efficient fullerene-free solar cells with wide optical band gap polymers based on fluorinated benzotriazole and asymmetric benzodithiophene
Source: Royal Society of Chemistry journal article supplement (doi:10.1039/c7ta07390a), 2017-01-01
Supplement: c7ta07390a1.pdf [file c7ta07390a1.pdf]

Electronic Supplementary Material (ESI) for Journal of Materials Chemistry A.

This journal is © The Royal Society of Chemistry 2017

Electronic Supplementary information (ESI)

**Efficient Fullerene-Free Solar Cells with Wide Optical Band Gap  
Polymers Based on Fluorinated Benzotriazole and Asymmetric  
Benzodithiophene**

Zhe Liu,<sup>‡</sup> <sup>a</sup>Deyu Liu,<sup>‡bd</sup> Kaili Zhang,<sup>a</sup> Tingting Zhu,<sup>a</sup> Yaqian Zhong,<sup>a</sup> Feng Li,<sup>c</sup>  
Yonghai Li,<sup>b</sup> Mingliang Sun<sup>\*a</sup> and Renqiang Yang<sup>\*b</sup>

*a. Institute of Material Science and Engineering, Ocean University of China, Qingdao 266100, China. \*E-mail: mlsun@ouc.edu.cn;*

*b. CAS Key Laboratory of Bio-based Materials, Qingdao Institute of Bioenergy and Bioprocess Technology, Chinese Academy of Sciences, Qingdao 266101, China. \*E-mail: yangrq@qibebt.ac.cn;*

*c. Key Laboratory of Rubber-Plastics of Ministry of Education/Shandong Province, School of Polymer Science and Engineering, Qingdao University of Science & Technology, 53 Zhengzhou Road, Qingdao 266042, China*

*d. University of Chinese Academy of Sciences, Beijing 100049, China*

<sup>‡</sup> Electronic supplementary information (ESI) available. See DOI: 10.1039/x0xx00000x

<sup>‡</sup> Zhe Liu and Deyu Liu contributed equally to this work.

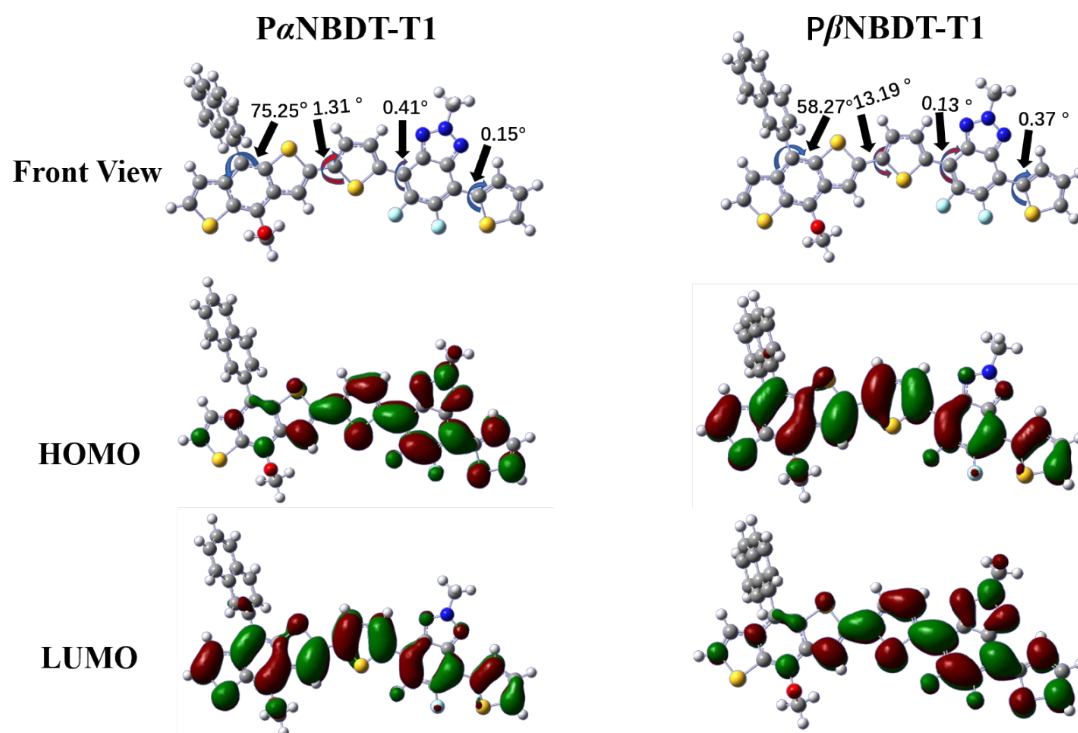

**Fig. S1** DFT calculated optimal geometries and electron density distributions of P $\alpha$ NBDT-T1 and P $\beta$ NBDT-T1.

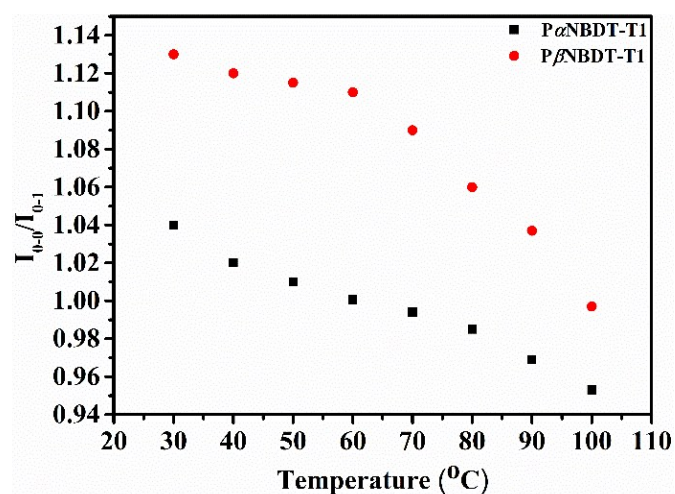

**Fig. S2**  $I_{0-0}/I_{0-1}$  (UV-vis absorption intensity at  $\lambda_{0-0}$  and  $\lambda_{0-1}$ ) of polymer solution at different temperature.

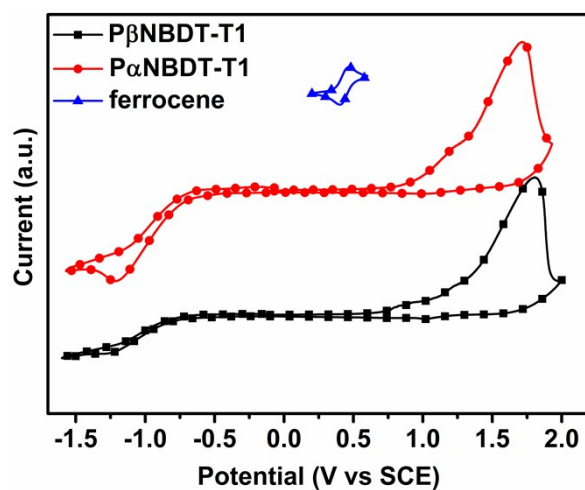

**Fig. S3** Electrochemical cyclic voltammetry curves of the P $\alpha$ NBDT-T1 and P $\beta$ NBDT-T1.

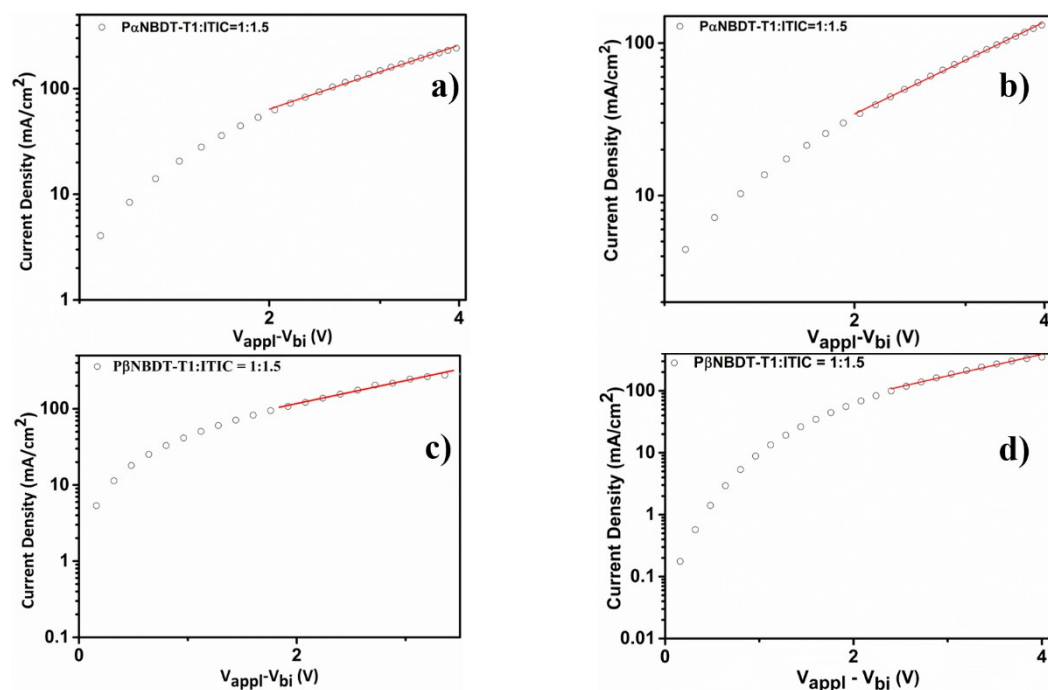

**Fig. S4** Hole mobility characteristics of optimum devices based on P $\alpha$ NBDT-T1/P $\beta$ NBDT-T1 and ITIC (a and c), electron mobility of optimum devices based on P $\alpha$ NBDT-T1/P $\beta$ NBDT-T1 and ITIC (b and d).

Table S1. Photovoltaic Properties of PSCs Based on different ratios of Polymers and acceptor materials

| Device                                 | Ratio<br>(w/w) | $V_{OC}$<br>(V) | $J_{SC}$<br>(mA cm <sup>-2</sup> ) | FF<br>(%) | PCE<br>(%) |
|----------------------------------------|----------------|-----------------|------------------------------------|-----------|------------|
| P $\alpha$ NBDT-T1/ITIC                | 1:1            | 0.87            | 15.96                              | 51.18     | 7.11       |
|                                        | 1:1.2          | 0.85            | 17.92                              | 55.46     | 8.45       |
|                                        | 1:2            | 0.86            | 17.54                              | 52.36     | 7.90       |
|                                        | 2:1            | 0.84            | 15.25                              | 53.41     | 6.84       |
| P $\beta$ NBDT-T1/ITIC                 | 1:1            | 0.78            | 16.68                              | 49.43     | 6.43       |
|                                        | 1:2            | 0.74            | 16.74                              | 46.50     | 5.52       |
|                                        | 2:1            | 0.75            | 16.03                              | 47.88     | 5.76       |
| P $\alpha$ NBDT-T1/PC <sub>71</sub> BM | 1:1            | 0.79            | 6.67                               | 45.81     | 2.41       |
|                                        | 1:1.5          | 0.78            | 3.64                               | 50.89     | 1.44       |
| P $\beta$ NBDT-T1/PC <sub>71</sub> BM  | 1:1            | 0.75            | 8.67                               | 58.23     | 3.79       |
|                                        | 1:2            | 0.72            | 8.91                               | 67.11     | 4.30       |
